# Supplementary material for: Variability in oxygen isotopic fractionation of enzymatic O 2 consumption
Source: Copernicus journal article supplement (doi:10.5194/egusphere-2025-1193), 2025-03-18
Supplement: Supplementary file [file egusphere-2025-1193-AC2-supplement.pdf]

#### Appendix D: Derivation of apparent correlation between $^{18}\text{O}$ -KIE and $K_m(\text{O}_2)$

To reconcile the apparent correlation between  $^{18}\text{O}$ -KIEs and  $K_m(\text{O}_2)$  as shown in Fig. 4, we consider a simple two-step enzymatic reaction involving a reversible  $\text{O}_2$  binding step and an irreversible reaction step converting enzyme-bound  $\text{O}_2$  into products (either  $\text{H}_2\text{O}_2$  or hydroxylated organic substrate) as shown in Eq. D1,

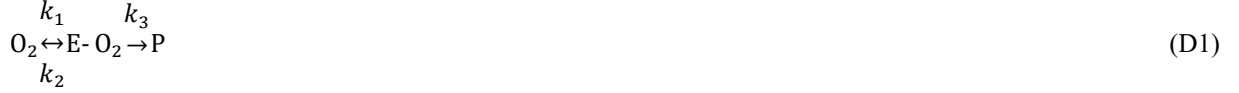

where  $\text{E-O}_2$  is the enzyme-bound  $\text{O}_2$ ,  $\text{P}$  represents the reaction products, and  $k_1$ ,  $k_2$ , and  $k_3$  are elementary reaction rate constants of the forward and backward reactions. In this case, the measured  $^{18}\text{O}$ -KIE is related to the intrinsic equilibrium and kinetic isotope effects of the two elementary steps through the forward commitment to catalysis,  $k_3/k_2$ , as shown in Eq. D2 (Cleland 2005),

$$^{18}\text{O-KIE}_{\text{measured}} = \frac{\text{EIE}_1 \text{KIE}_3 + k_3/k_2 \text{KIE}_1}{1 + k_3/k_2} \quad (\text{D2})$$

where  $\text{EIE}_1$  is the equilibrium isotope effect of the  $\text{O}_2$  binding step and  $\text{KIE}_1$  and  $\text{KIE}_3$  are the kinetic isotope effects of the  $\text{O}_2$  binding and reaction steps associated with rates  $k_1$  and  $k_3$ , respectively. From Eq. D2, two extreme cases can be derived. If  $\text{O}_2$  binding alone is rate-limiting ( $k_3 \gg k_2$ ), the measured  $^{18}\text{O}$ -KIE will approximate  $\text{KIE}_1$ . If the second reaction step is rate-limiting ( $k_3 \ll k_2$ ), the measured  $^{18}\text{O}$ -KIE will approximate the product of  $\text{EIE}_1$  and  $\text{KIE}_3$ . When we start with the latter case, which has a small  $k_3/k_2$ , and increase the forward commitment gradually, the measured  $^{18}\text{O}$ -KIE will slowly decrease assuming  $\text{KIE}_1$  is smaller than  $\text{EIE}_1 \text{KIE}_3$ . For such a reaction, plotting measured  $^{18}\text{O}$ -KIEs vs.  $k_3/k_2$  will yield a similar (apparently linear) trend as shown in Fig. 4 as long as the commitment factor ( $k_3/k_2$ ) is below 1. As shown in Eq. D3,  $k_3/k_2$  can be related to  $K_m(\text{O}_2)$ , if we consider  $K_m(\text{O}_2)$  to be  $(k_3 + k_2)/k_1$  and  $K_d$ , the dissociation constant of  $\text{O}_2$ , to be  $k_2/k_1$ . The trend observed in Fig. 4 can thus be explained if  $K_d$  varies much less than  $K_m(\text{O}_2)$  for this set of enzymes.

$$\frac{k_3}{k_2} = \frac{k_3}{k_2} + \frac{k_2}{k_2} - 1 = \frac{k_3 + k_2}{k_2} - 1 = \frac{K_m(\text{O}_2)}{K_d} - 1 \quad (\text{D3})$$
